# Supplementary material
Source: MDPI journal article supplement (https://www.mdpi.com/2227-9040/12/4/69)
Supplement: s1 [file s1]

# Electrochemical Sensor for the Evaluation of Doxorubicin from Novel Pharmaceutical Formulations and Serum

Alexandra Pusta<sup>1,2</sup>, Mihaela Tertis<sup>1</sup>, Irina Bura<sup>1</sup>, Diana Bogdan<sup>3</sup>, Maria Suciuc<sup>3,4</sup>, Simona Mirel<sup>2</sup> and Cecilia Cristea<sup>1</sup>

<sup>1</sup> Department of Analytical Chemistry, Iuliu Hatieganu University of Medicine and Pharmacy, Cluj-Napoca, 400349, Romania;

<sup>2</sup> Department of Medical Devices, Iuliu Hatieganu University of Medicine and Pharmacy, Cluj-Napoca, 400349, Romania;

<sup>3</sup> National Institute for Research and Development of Isotopic and Molecular Technologies, 67-103 Donat Street, 400293, Cluj-Napoca, Romania;

<sup>4</sup> Electron Microscopy Centre "C. Craciun", Biology and Geology Faculty, Babes-Bolyai University Cluj-Napoca, 5-7 Clinicilor Str. 400006 Cluj-Napoca, Romania (M.S.)

\* Correspondence: ccristea@umfcluj.ro; 4 Louis Pasteur Street 400349, Cluj-Napoca, Romania; Tel.: +40 721 375 789

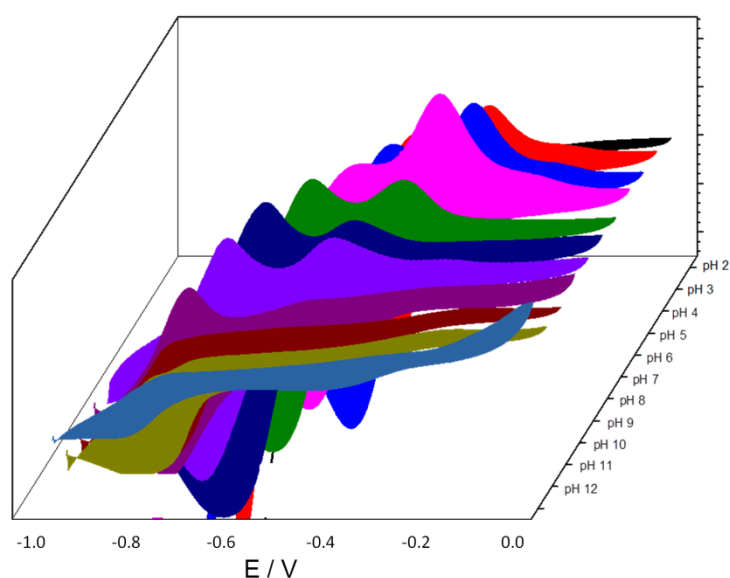

**Figure S1.** Cyclic 3D voltammograms obtained for 100 µg/mL DOX solutions prepared in BRB pH 2 – 12 (A).

**Table S1.** Values of the EIS parameters derived from the equivalent circuit through the fitting and simulation option of the software at each step of the sensor elaboration protocol.

| Development phase                         | $R_s$ ( $\Omega$ ) | $R_{CT}$ ( $\Omega$ ) | CPE ( $\mu A/V$ ); N | W (mA/V) | $R_1$ ( $\Omega$ ) | $C_1$ ( $\mu F$ ) | $X^2$ |
|-------------------------------------------|--------------------|-----------------------|----------------------|----------|--------------------|-------------------|-------|
| Carbon-based WE after printing process    | 35                 | 5540                  | 1.71<br>0.9          | 0.68     | 0.27               | 0.32              | 0.028 |
| Activated WE                              | 21                 | 91                    | 7.99<br>0.97         | 7.6      | -                  | -                 | 0.003 |
| WE after AuNPs electrochemical deposition | 43                 | 26                    | 19.9<br>0.85         | 8.15     | -                  | -                 | 0.004 |

**Table S2.** Influence of the supporting electrolyte on the detection of DOX from a 500 µg/mL solution. Tests performed using X with the following parameters: scan between –1.2 and – 0.4 V, potential step 5 mV, amplitude 0.2 V, interval time 0.1 s, modulation time 0.05 s, scan rate 50 mV/s. Iox – peak current intensity, Eox – peak potential;.

| Electrolyte                          | Iox (µA) | Eox (V) | Iox (µA) | Eox (V) |
|--------------------------------------|----------|---------|----------|---------|
| 0.1 M H <sub>2</sub> SO <sub>4</sub> | 38       | 0.05    | 41.8     | 0.4     |
| 0.1 M HCl                            | 4        | 0.00045 | -        | -       |
| 0.1 M PBS pH 7.4,                    | 11.72    | 0.551   | -        | -       |
| 0.2 M Carbonate<br>buffer pH 10,     | 7.83     | 0.3     | -        | -       |

PBS – phosphate buffer saline; Iox – oxidation current intensity; Eox – oxidation potential;

**Table S3.** Calibration curves obtained for DOX in phosphate buffer saline of different pH values.

| Media      | $\lambda_{\max}$ (nm) | Calibration curve equation | R <sup>2</sup> |
|------------|-----------------------|----------------------------|----------------|
| PBS pH 5.0 | 482                   | A = 0.017 [DOX] + 0.011    | 0.999          |
| PBS pH 6.0 |                       | A = 0.075 [DOX] + 0.002    | 0.998          |
| PBS pH 7.4 |                       | A = 0.016 [DOX] + 0.001    | 0.999          |

PBS – phosphate buffer saline; A – absorbance;  $\lambda_{\max}$  – maximum absorbance wavelength

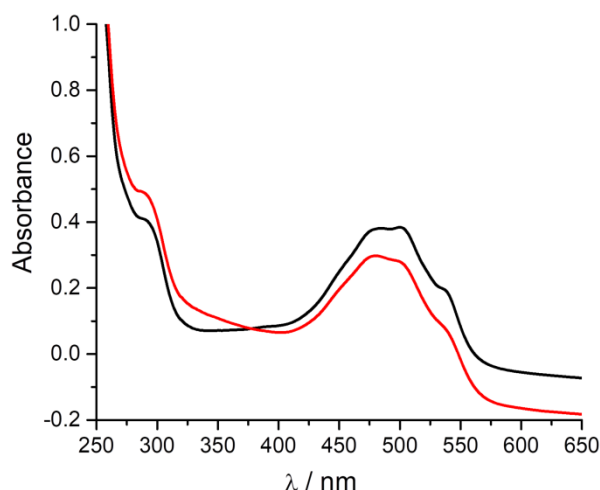

**Figure S2.** UV-Vis spectra registered in the 250 -650 nm domain for the 2 mg/mL DOX solution before incubation with the nanosomes (before loading) loading solution before (black) and after incubation with the nanosomes (after loading)(red). The decrease in absorbance is attributed to the encapsulation of DOX in the nanosomes. .

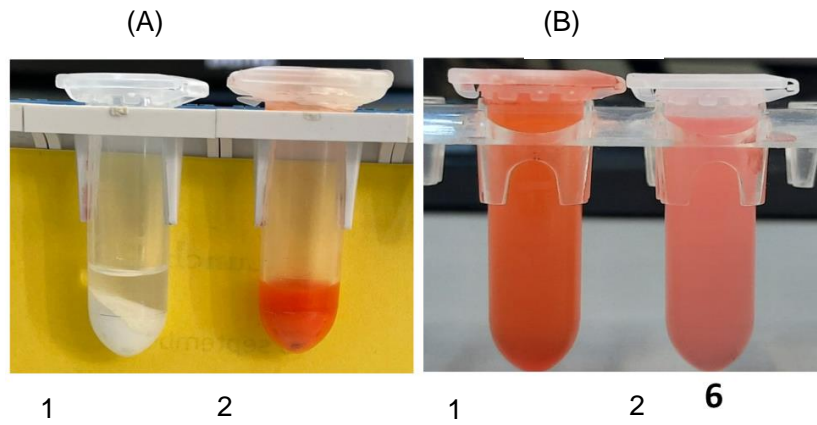

**Figure S3.** Images of the nanosome suspensions before (A1) and after (A2) loading from a 2 mg/mL DOX solution prepared in acetate buffer C. Images of the nanosome suspensions after 72 h of release in PBS pH 5 (B1) and pH 7.4 (B2).
